# Supplementary material for: Removal of the Basic and Diazo Dyes from Aqueous Solution by the Frustules of Halamphora cf. salinicola (Bacillariophyta)
Source: MDPI journal article supplement (doi:10.3390/md21050312), 2023-05-19
Supplement: s1 [file s1]

Article

# Removal of the Basic and Diazo Dyes from Aqueous Solution by the Frustules of *Halamphora* cf. *salinicola* (Bacillariophyta)

Aleksandra Golubeva<sup>1\*</sup>, Piya Roychoudhury<sup>1</sup>, Przemysław Dąbek<sup>1</sup>, Oleksandra Pryshchepa<sup>2</sup>, Paweł Pomastowski<sup>2</sup>, Jagoda Pałczyńska<sup>3</sup>, Piotr Piszczek<sup>3</sup>, Michał Gloc<sup>4</sup>, Renata Dobrucka<sup>4,5</sup>, Agnieszka Feliczak-Guzik<sup>6</sup>, Izabela Nowak<sup>6</sup>, Bogusław Buszewski<sup>7,8</sup> and Andrzej Witkowski<sup>1\*</sup>

<sup>1</sup> Institute of Marine and Environmental Sciences, University of Szczecin, Mickiewicza 16a, 70-383 Szczecin, Poland; alexandra.golubeva@phd.usz.edu.pl (A.G); piyaroychoudhury2@gmail.com (P.R.); przemyslaw.dabek@usz.edu.pl (P.D.); andrzej.witkowski@usz.edu.pl (A.W.).

<sup>2</sup> Centre for Modern Interdisciplinary Technologies, Nicolaus Copernicus University, Wileńska 4, 87-100, Toruń, Poland; pryshchepa.alexie@gmail.com (O.P.); pomastowski.pawel@gmail.com (P.P.).

<sup>3</sup> Department of Inorganic and Coordination Chemistry, Faculty of Chemistry, Nicolaus Copernicus University in Toruń, Gagarina 7, 87-100 Toruń, Poland; 296600@stud.umk.pl (J.P.); pischczek@umk.pl (P.P.).

<sup>4</sup> Faculty of Materials Science and Engineering, Warsaw University of Technology, Wołoska 141, 02-507 Warsaw, Poland; michalgloc@wp.pl (M.G.); renata.dobrucka@pw.edu.pl (R.D.).

<sup>5</sup> Department of Industrial Products and Packaging Quality, Institute of Quality Science, Poznań University of Economics and Business, al. Niepodległości 10, 61-875 Poznań, Poland; renata.dobrucka@ue.poznan.pl (R.D.).

<sup>6</sup> Department of Applied Chemistry, Faculty of Chemistry, Adam Mickiewicz University, Uniwersytetu Poznańskiego 8, 61-614, Poznań, Poland; agnieszka.feliczak-guzik@amu.edu.pl (A.F-G.); nowakiza@amu.edu.pl (I.N.).

<sup>7</sup> Department of Environmental Chemistry and Bioanalysis, Faculty of Chemistry, Nicolaus Copernicus University, Gagarina 7, 87-100 Toruń, Poland; bbusz@umk.pl (B.B.).

<sup>8</sup> Prof. Jan Czochralski Kuyavian-Pomeranian Research & Development Centre, Krasińskiego 4, 87-100 Toruń, Poland; bbusz@umk.pl (B.B.).

\* Correspondence: alexandra.golubeva@phd.usz.edu.pl, Tel.: +48-534-030-336; andrzej.witkowski@usz.edu.pl

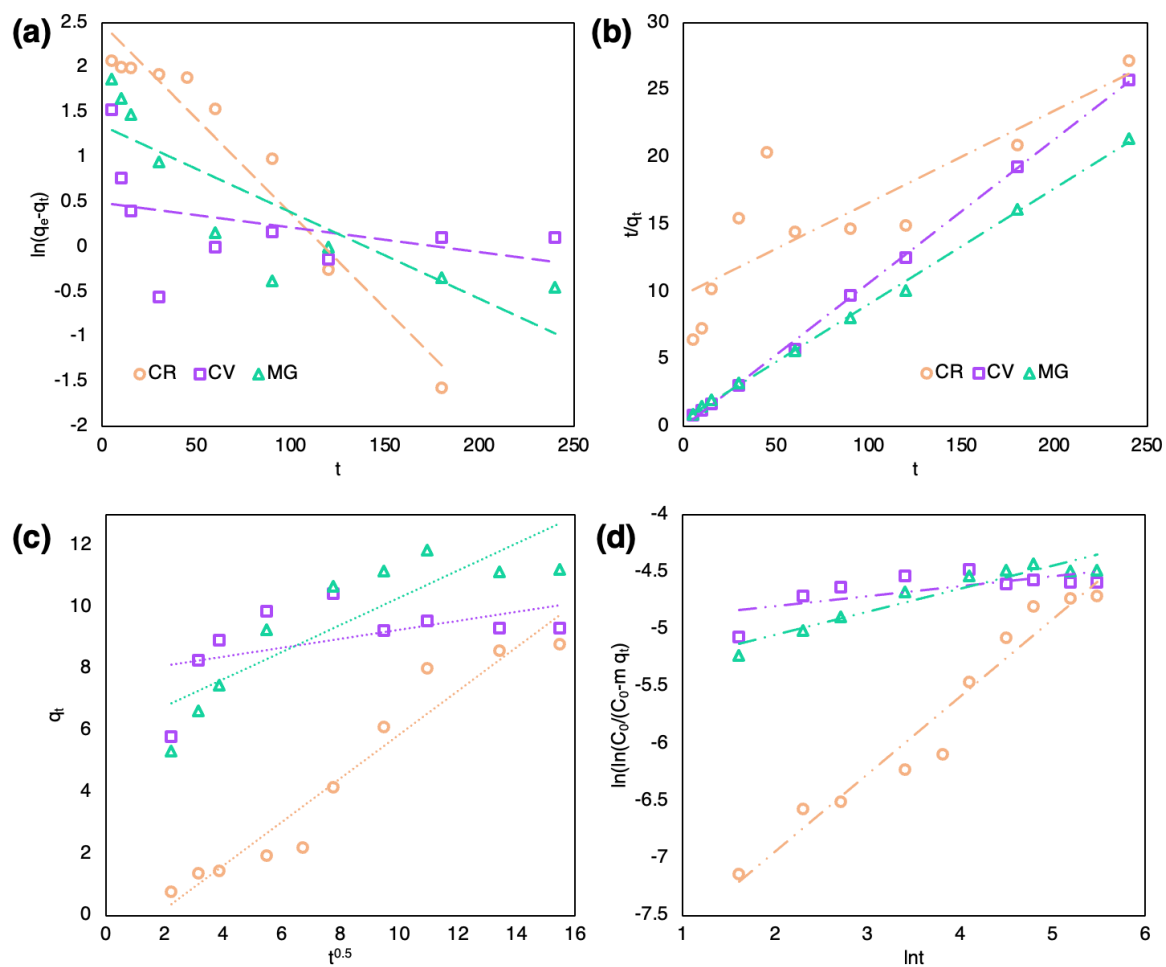

**Figure S1.** Adsorption kinetic and diffusion studies: (a) Pseudo-First Order; (b) Pseudo-Second Order; (c) Intra-particle diffusion; (d) Pore diffusion model (experimental data: orange circles – CR, violet squares – CV, green triangles – MG; calculated data: Pseudo-First Order – dashed line, Pseudo-Second Order – dash dotted line, Intra-particle diffusion – dotted line, Pore diffusion – double-dash dotted line).

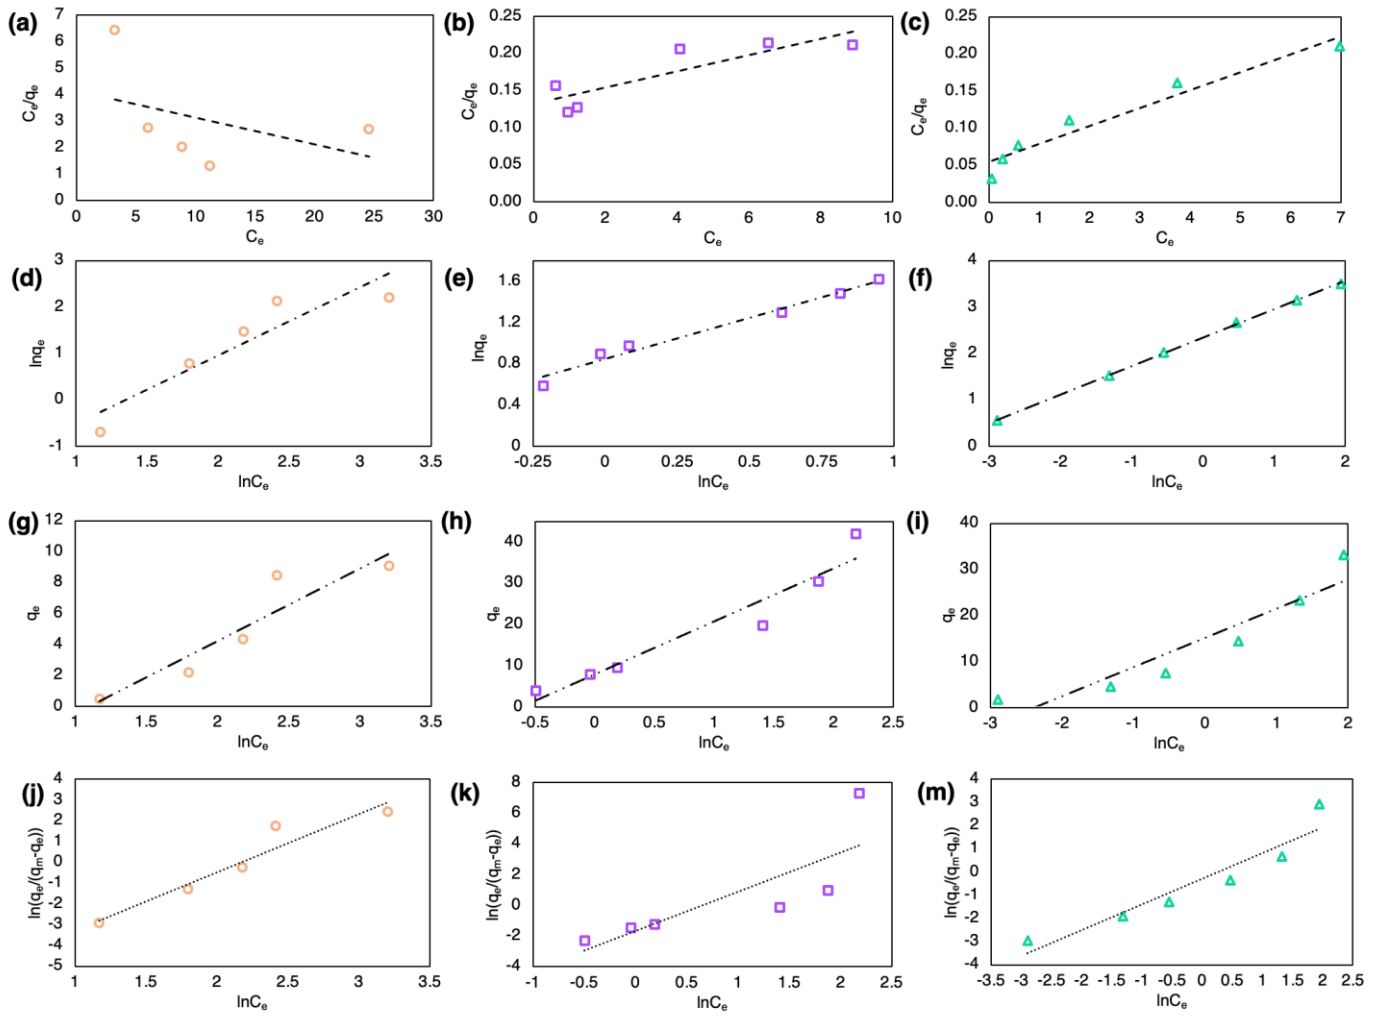

**Figure S2.** Adsorption equilibrium study: Langmuir model for (a) CR, (b) CV, (c) MG; Freundlich model for (d) CR, (e) CV, (f) MG; Temkin model for (g) CR, (h) CV, (i) MG; and Sips model for (j) CR, (k) CV, (m) MG (experimental data: orange circles – CR, violet squares – CV, green triangles – MG; calculated data: Langmuir – dashed line, Freundlich – dash dotted line, Temkin – double dash dotted line, Sips – dotted line)

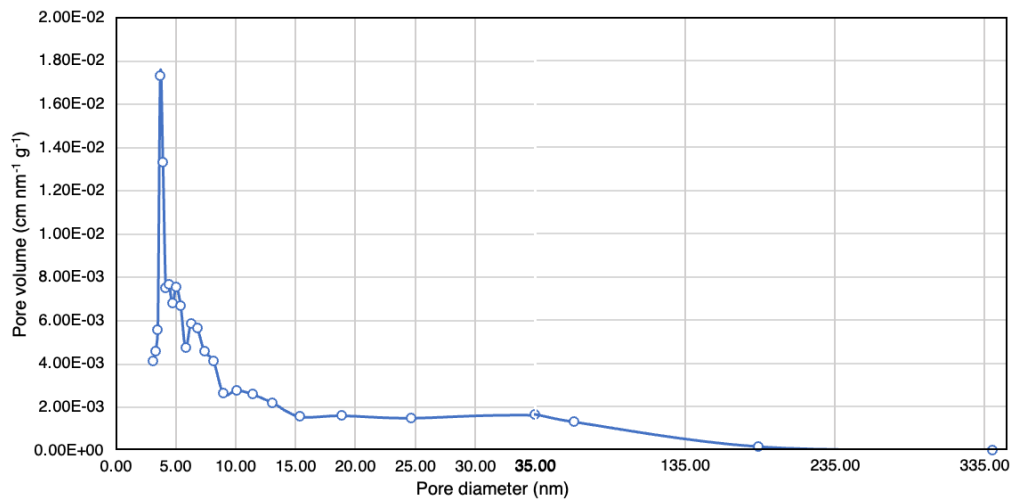

**Figure S3.** Pore size distribution of the diatom frustules of SZCZM1454 *H. cf. salinicola*

**Table S1.** Linearized forms of the kinetic and isotherm models' equations and parameters

| Models                               | Equation                                                                                                                 |     | Description of parameters                                                                                                                                                                                                                                                                                                                                                                                                                                                                                                                                      | Ref.  |
|--------------------------------------|--------------------------------------------------------------------------------------------------------------------------|-----|----------------------------------------------------------------------------------------------------------------------------------------------------------------------------------------------------------------------------------------------------------------------------------------------------------------------------------------------------------------------------------------------------------------------------------------------------------------------------------------------------------------------------------------------------------------|-------|
| <b>Kinetic study</b>                 |                                                                                                                          |     |                                                                                                                                                                                                                                                                                                                                                                                                                                                                                                                                                                |       |
| <i>Pseudo-first order</i>            | $\ln(q_1 - q_t) = \ln q_1 - k_1 t$                                                                                       | (1) | $q_t$ (mg g <sup>-1</sup> ) – amount adsorbed at given time (t, min)<br>$q_1$ (mg g <sup>-1</sup> ) – adsorbent capacity at equilibrium<br>$k_1$ (min <sup>-1</sup> ) – Pseudo-first order constant rate                                                                                                                                                                                                                                                                                                                                                       | [133] |
| <i>Pseudo-second order</i>           | $\frac{t}{q_t} = \frac{1}{k_2 q_2^2} + \frac{1}{q_2}$                                                                    | (2) | $q_2$ (mg g <sup>-1</sup> ) – adsorbent capacity at equilibrium<br>$k_2$ (g (mg min) <sup>-1</sup> ) – Pseudo-second order constant rate<br>$\alpha$ (mg (g min) <sup>-1</sup> ) – initial adsorption rate<br>$\beta$ (mg g <sup>-1</sup> ) – desorption constant                                                                                                                                                                                                                                                                                              | [134] |
| <b>Diffusion study</b>               |                                                                                                                          |     |                                                                                                                                                                                                                                                                                                                                                                                                                                                                                                                                                                |       |
| <i>Boyd's</i>                        | $B_t = -0.4977 - \ln(1 - \frac{q_t}{q_e})$                                                                               | (3) | $q_e$ (mg g <sup>-1</sup> ) – amount adsorbed at equilibrium<br>$B_t$ – mathematical function of F<br>F – the fraction of metal ion adsorbed at any time (t)                                                                                                                                                                                                                                                                                                                                                                                                   | [135] |
| <i>Intra particle diffusion</i>      | $q_t = k_{wm} t^{0.5} + B$                                                                                               | (4) | $q_t$ (mg g <sup>-1</sup> ) – amount adsorbed at given time (t, min)<br>$K_{wm}$ (mg (g min <sup>0.5</sup> ) <sup>-1</sup> ) – Intra-particle diffusion rate constant                                                                                                                                                                                                                                                                                                                                                                                          | [136] |
| <i>Pore diffusion</i>                | $\log \log \left( \frac{C_0}{C_0 - m q_t} \right) = \log \left( \frac{m K_\beta}{2.303 V} \right) + \Delta \beta \log t$ | (5) | B (mg g <sup>-1</sup> ) – intercept<br>$C_0$ (mg L <sup>-1</sup> ) – initial concentration of MB<br>m (g) – mass of adsorbent g<br>$\Delta \beta$ and $K_\beta$ – Bangham constants<br>V (mL) – volume of solution                                                                                                                                                                                                                                                                                                                                             | [137] |
| <b>Equilibrium study (isotherms)</b> |                                                                                                                          |     |                                                                                                                                                                                                                                                                                                                                                                                                                                                                                                                                                                |       |
| <i>Langmuir</i>                      | $\frac{C_e}{q_e} = \frac{1}{K_L Q_{max}} + \frac{C_e}{Q_{max}}$                                                          | (6) | $q_e$ (mg g <sup>-1</sup> ) – adsorption capacity at equilibrium<br>$C_e$ (mg L <sup>-1</sup> ) – concentration of MB dye at equilibrium                                                                                                                                                                                                                                                                                                                                                                                                                       | [138] |
| <i>Freundlich</i>                    | $\ln q_e = \ln K_F + \frac{1}{n} \ln C_e$                                                                                | (7) | $q_{max}$ (mg g <sup>-1</sup> ) – maximum monolayer adsorption capacity of Langmuir                                                                                                                                                                                                                                                                                                                                                                                                                                                                            | [139] |
| <i>Temkin</i>                        | $q_e = \frac{RT}{b} \ln C_e + \frac{RT}{b} \ln K_m$                                                                      | (8) | $K_L$ (L mg <sup>-1</sup> ) – Langmuir constant                                                                                                                                                                                                                                                                                                                                                                                                                                                                                                                | [140] |
| <i>Sips</i>                          | $\ln \left( \frac{q_e}{q_m - q_e} \right) = \frac{1}{n} \ln C_e + \ln K_s^{\frac{1}{n}}$                                 | (9) | $K_F$ [(mg g <sup>-1</sup> ) (mg L <sup>-1</sup> ) <sup>-n</sup> ] – Freundlich constant<br>n – dimensionless Freundlich intensity parameter<br>R (J [mol K] <sup>-1</sup> ) – universal gas constant<br>T (K) – temperature<br>b (J mol <sup>-1</sup> ) – Temkin constant related to sorption heat<br>$K_m$ (L g <sup>-1</sup> ) – Temkin isotherm constant<br>$q_m$ (mg g <sup>-1</sup> ) – the Sips maximum adsorption capacity<br>$K_s$ [(mg L <sup>-1</sup> ) <sup>-1/n</sup> ] – the Sips equilibrium constant<br>n – the exponent of Sips where 0<1/n≤1 | [141] |
